# Supplementary material for: Detection the eDNA of Batrachuperus taibaiensis from the Zhouzhi Heihe River Using a Nested PCR Method and DNA Barcoding
Source: MDPI journal article supplement (doi:10.3390/ani12091105), 2022-04-25
Supplement: s1 [file s1]

Table S1 Total eDNA concentration.

| Sampling site of San Cha River |                           |                   |                           | Sampling site of Miao Gou River |                           |                   |                           |
|--------------------------------|---------------------------|-------------------|---------------------------|---------------------------------|---------------------------|-------------------|---------------------------|
| April collection               |                           | August collection |                           | April collection                |                           | August collection |                           |
| Site name                      | DNA concentration (ng/μl) | Site name         | DNA concentration (ng/μl) | Site name                       | DNA concentration (ng/μl) | Site name         | DNA concentration (ng/μl) |
| 4-1-1-1                        | 21.4                      | 8-1-1-1           | 53.1                      | 4-2-1-1                         | 11.3                      | 8-2-1-1           | 75.5                      |
|                                | 22.3                      |                   | 53.4                      |                                 | 12.0                      |                   | 74.7                      |
| 4-1-1-2                        | 88.6/87.5                 | 8-1-1-2           | 49.9                      | 4-2-1-2                         | 29.9                      | 8-2-1-2           | 49.4                      |
| 4-1-1-3                        | 34.4/35.2                 |                   | 49.5                      |                                 | 31.2                      |                   | 49.8                      |
| Blank                          | 0.7                       | Blank             | 0.7                       | Blank                           | 0.4                       | Blank             | 0.5                       |
| 4-1-2-1                        | 10.4                      | 8-1-2-1           | 34.6                      | 4-2-2-1                         | 4.5                       | 8-2-2-1           | 67.9                      |
|                                | 12.5                      |                   | 34.7                      |                                 | 5.6                       |                   | 65.9                      |
| 4-1-2-2                        | 8.4                       | 8-1-2-2           | 15.5                      | 4-2-2-2                         | 52.4                      | 8-2-2-2           | 60.4                      |
|                                | 9.5                       |                   | 16.5                      |                                 | 52.9                      |                   | 61.6                      |
| Blank                          | 0.5                       | Blank             | 0.6                       | Blank                           | 0.9                       | Blank             | 0.3                       |
| 4-1-3-1                        | 40.5                      | 8-1-3-1           | 26.1                      | 4-2-3-1                         | 12.9                      | 8-2-3-1           | 108.6                     |
|                                | 42.5                      |                   | 27.9                      |                                 | 13.2                      |                   | 106.4                     |
| 4-1-3-2                        | 42.2                      | 8-1-3-2           | 15.8                      | 4-2-3-2                         | 11.9                      | 8-2-3-2           | 39.5                      |
|                                | 43.6                      |                   | 15.9                      |                                 | 12.3                      |                   | 38.9                      |
| Blank                          | 0.8                       | Blank             | 0.2                       | Blank                           | 0.3                       | Blank             | 0.2                       |
| 4-1-4-1                        | 10.1                      | 8-1-4-1           | 59.7                      | 4-2-4-1                         | 55.2                      | 8-2-4-1           | 29.4                      |
|                                | 15.1                      |                   | 59.8                      |                                 | 59.3                      |                   | 28.3                      |
| 4-1-4-2                        | 17.1                      | 8-1-4-2           | 27.0                      | 4-2-4-2                         | 10.1                      | 8-2-4-2           | 45.4                      |
|                                | 18.9                      |                   | 27.1                      |                                 | 12.3                      |                   | 45.9                      |
| Blank                          | 0.5                       | Blank             | 0.1                       | Blank                           | 0.7                       | Blank             | 0.5                       |
| 4-1-5-1                        | 46.9                      | 8-1-5-1           | 35.8                      | 4-2-5-1                         | 13.2                      | 8-2-5-1           | 30.2                      |
|                                | 47.6                      |                   | 38.3                      |                                 | 14.2                      |                   | 29.9                      |
| 4-1-5-2                        | 27.8                      | 8-1-5-2           | 18.2                      | 4-2-5-2                         | 4.4                       | 8-2-5-2           | 34.2                      |
|                                | 29.5                      |                   | 17.8                      |                                 | 5.9                       |                   | 35.7                      |
| Blank                          | 0.5                       | Blank             | 0.5                       | Blank                           | 0.6                       | Blank             | 0.6                       |
| 4-1-6-1                        | 68.2                      |                   |                           | 4-2-6-1                         | 63                        |                   |                           |
|                                | 69.5                      |                   |                           |                                 | 65                        |                   |                           |
| 4-1-6-2                        | 37.9                      |                   |                           | 4-2-6-2                         | 28.2                      |                   |                           |
|                                | 38.2                      |                   |                           |                                 | 30                        |                   |                           |
| Blank                          | 0.3                       |                   |                           | Blank                           | 0.6                       |                   |                           |

Note: "blank" means distilled water was filtered as a negative control for each sample.

Figure S1. List of species identification results using the NCBI GenBank in this study.
